# Supplementary material for: GJA4/Connexin 37 Mutations Correlate with Secondary Lymphedema Following Surgery in Breast Cancer Patients
Source: Biomedicines. 2018 Feb 22;6(1):23. doi: 10.3390/biomedicines6010023 (PMC5874680; doi:10.3390/biomedicines6010023)
Supplement: Supplementary file 1 [file biomedicines-06-00023-s001.xlsx]

## Sheet: All patient Data
Pationt number	lymphedema 1=yes , 2=no	Age	Height	Weight	Tomor size	Body surface area	Number of involved lymphnod	Number of drawn nodes	Surgery method	Polymorphism 3543	Polymorphism 705193
1	1	40	158	68	9	1.7	0	12	BCS	2	2
2	1	53	160	67	4	1.4	2	10	BCS	1	1
3	1	53	155	72	5	1.6	1	10	MRM	3	1
4	2	43	158	56	6	1.4	3	6	MRM	2	2
5	2	39	160	75	4	1.7	3	12	BCS	2	2
6	1	54	160	67	3	1.5	1	6	BCS	3	2
7	1	56	160	62	9	1.4	3	7	MRM	2	2
8	2	59	160	58	8	1.4	0	12	MRM	2	2
9	2	49	165	60	5	1.4	2	11	BCS	2	2
10	1	48	158	60	5	1.6	1	10	MRM	3	2
11	2	42	160	70	3	1.7	0	7	BCS	1	1
12	2	50	160	60	6	1.4	5	20	MRM	2	2
13	1	54	163	62	3	1.4	8	10	MRM	2	2
14	2	62	164	68	5	1.7	0	11	BCS	2	2
15	1	67	160	70	3	1.7	0	19	MRM	2	2
16	1	48	160	62	3	1.6	1	15	BCS	2	2
17	2	50	162	72	5	1.7	0	9	BCS	3	2
18	2	55	159	50	6	1.4	5	6	BCS	3	1
19	2	55	150	50	8	1.3	0	16	MRM	3	1
20	2	58	164	60	5	1.4	2	8	BCS	3	2
21	1	38	162	70	5	1.6	2	9	BCS	2	2
22	2	49	162	80	8	1.7	1	18	MRM	2	2
23	2	45	158	70	3	1.6	0	6	BCS	2	2
24	1	51	160	69	6	1.7	2	11	BCS	3	1
25	2	53	162	72	4	1.7	2	13	MRM	2	2
26	2	63	160	60	4	1.4	7	12	MRM	3	2
27	2	50	155	60	5	1.4	5	19	MRM	3	2
28	1	52	158	60	7	1.4	3	7	BCS	1	1
29	2	55	164	90	5	1.8	2	9	BCS	2	1
30	1	47	160	65	10	1.5	14	18	BCS	3	1
31	2	54	160	70	3	1.7	5	11	MRM	2	2
32	2	50	160	50	5	1.4	0	15	BCS	2	2
33	1	48	147	50	5	1.3	6	9	BCS	2	2
34	1	61	152	54	9	1.4	12	18	MRM	1	1
35	2	55	167	70	6	1.7	0	16	MRM	1	1
36	2	54	150	68	2	1.7	2	6	MRM	2	2
37	2	48	164	60	6	1.4	1	6	BCS	3	2
38	2	35	165	70	5	1.7	6	7	BCS	1	1
39	2	39	153	53	3	1.4	0	6	BCS	1	2
40	2	45	155	77	3	0	2	11	MRM	2	2
41	1	46	153	53	5	1.4	2	6	BCS	3	2
42	1	50	160	85	4	1.7	8	8	BCS	1	1
43	1	55	166	76	5	1.7	1	10	BCS	2	2
44	1	66	153	63	5	1.4	5	9	BCS	2	2
45	2	47	160	69	9	1.7	0	6	BCS	2	2
46	2	40	155	72	9	1.7	0	6	BCS	2	2
47	1	44	158	60	3	1.4	0	14	BCS	3	2
48	2	45	155	70	5	1.6	2	6	BCS	1	1
49	1	50	160	62	7	1.7	0	13	BCS	2	2
50	2	39	150	70	4	1.6	1	11	BCS	1	1
51	2	55	160	60	3	1.4	1	13	BCS	1	1
52	1	48	157	60	5	1.4	2	6	BCS	3	2
53	2	43	156	59	6	1.4	0	6	BCS	1	1
54	2	51	162	72	3	1.7	0	9	BCS	1	1
55	1	51	156	60	4	1.5	26	28	MRM	3	2
56	2	60	168	60	3	1.5	2	8	BCS	1	1
57	1	63	160	70	3	1.7	1	7	BCS	2	2
58	2	56	153	80	4	1.6	0	6	BCS	1	1
59	1	59	165	67	4	1.4	4	6	BCS	3	2
60	2	46	160	53	5	1.4	1	9	MRM	1	1
61	1	58	160	53	5	1.4	2	6	BCS	2	2
62	2	65	160	70	5	1.7	6	15	MRM	1	1
63	2	50	160	58	6	1.4	9	15	MRM	2	2
64	1	55	165	85	6	1.7	0	11	BCS	1	1
65	1	49	154	88	10	1.7	0	9	MRM	2	2
66	1	58	147	63	5	1.3	9	9	MRM	3	2
67	2	47	160	95	4	1.7	8	12	MRM	2	2
68	1	46	160	74	4	1.7	4	9	BCS	3	2
69	2	40	170	72	6	1.8	0	14	BCS	2	2
70	1	42	156	58	5	1.4	3	8	MRM	2	2
71	1	58	169	100	5	2.1	5	10	MRM	2	2
72	1	50	160	67	4	1.4	2	6	BCS	3	2
73	2	39	176	84	4	1.8	1	8	BCS	2	2
74	2	47	170	62	4	1.5	0	15	MRM	1	1
75	1	50	160	67	10	1.4	1	6	MRM	2	2
76	2	38	170	69	4	1.8	0	10	MRM	2	2
77	2	47	160	69	10	1.7	9	13	MRM	2	1
78	2	38	167	67	5	1.7	2	6	BCS	1	1
79	2	40	150	50	10	1.3	1	16	MRM	1	1
80	1	42	167	80	9	1.7	2	10	BCS	2	2
81	1	59	160	59	5	1.7	12	18	MRM	2	2
82	2	38	156	59	5	1.4	0	13	BCS	1	1
83	1	46	153	80	3	1.7	8	10	MRM	2	2
84	2	45	154	60	5	1.3	2	6	BCS	1	1
85	1	50	155	80	10	1.7	16	20	MRM	2	2
86	1	35	169	66	8	1.5	4	10	BCS	2	2
87	1	52	180	100	2	2.2	1	8	BCS	2	2
88	1	47	155	70	5	1.6	8	11	BCS	2	2
89	2	50	150	50	4	1.4	2	6	MRM	1	1
90	2	40	167	75	5	1.7	4	7	BCS	1	1
91	1	56	145	65	5	1.4	10	18	BCS	2	2
92	2	57	150	68	5	1.4	6	10	MRM	1	1
93	2	64	160	68	5	1.5	0	17	MRM	1	1
94	1	39	156	59	6	1.4	21	24	BCS	2	2
95	1	43	170	72	5	1.8	10	14	BCS	3	2
96	1	40	170	70	5	1.8	2	6	BCS	2	2
97	1	48	165	86	4	1.6	4	6	BCS	3	2
98	1	48	168	90	6	1.8	2	10	BCS	2	2
99	1	70	155	55	6	1.4	4	6	BCS	2	2
100	1	38	160	62	5	1.4	4	7	BCS	2	2
101	1	35	176	84	4	1.8	2	12	MRM	2	2
102	1	47	160	85	3	1.6	2	10	BCS	2	2

## Sheet: with LymE
Pationt number	Age	Height	Weight	Tomor size	Body surface area	Number of involved lymphnod	Number of drawn nodes	Surgery method	Polymorphism 3543	Polymorphism 705193
1	40	158	68	9	1.7	0	12	1	2	2
2	53	160	67	4	1.4	2	10	1	1	1
3	53	155	72	5	1.6	1	10	2	3	1
6	54	160	67	3	1.5	1	6	1	3	2
7	56	160	62	9	1.4	3	7	2	2	2
10	48	158	60	5	1.6	1	10	2	3	2
13	54	163	62	3	1.4	8	10	2	2	2
15	67	160	70	3	1.7	0	19	2	2	2
16	48	160	62	3	1.6	1	15	1	2	2
21	38	162	70	5	1.6	2	9	1	2	2
24	51	160	69	6	1.7	2	11	1	3	1
28	52	158	60	7	1.4	3	7	1	1	1
30	47	160	65	10	1.5	14	18	1	3	1
33	48	147	50	5	1.3	6	9	1	2	2
34	61	152	54	9	1.4	12	18	2	1	1
41	46	153	53	5	1.4	2	6	1	3	2
42	50	160	85	4	1.7	8	8	1	1	1
43	55	166	76	5	1.7	1	10	1	2	2
44	66	153	63	5	1.4	5	9	1	2	2
47	44	158	60	3	1.4	0	14	1	3	2
49	50	160	62	7	1.7	0	13	1	2	2
52	48	157	60	5	1.4	2	6	1	3	2
55	51	156	60	4	1.5	26	28	2	3	2
57	63	160	70	2	1.7	1	7	1	2	2
59	59	165	67	4	1.4	4	6	1	3	2
61	58	160	53	5	1.4	2	6	1	2	2
64	55	165	85	6	1.7	0	11	1	1	1
65	49	154	88	10	1.7	0	9	2	2	2
66	58	147	63	5	1.3	9	9	2	3	2
68	46	160	74	4	1.7	4	9	1	3	2
70	42	156	58	5	1.4	3	8	2	2	2
71	58	169	100	5	2.1	5	10	2	2	2
72	50	160	67	4	1.4	2	6	1	3	2
75	50	160	67	10	1.4	1	6	2	2	2
80	42	167	80	9	1.7	2	10	1	2	2
81	59	160	59	5	1.7	12	18	2	2	2
83	46	153	80	3	1.7	8	10	2	2	2
85	50	155	80	10	1.7	16	20	2	2	2
86	35	169	66	8	1.5	4	10	1	2	2
87	52	180	100	2	2.2	1	8	1	2	2
88	47	155	70	5	1.6	8	11	1	2	2
91	56	145	65	5	1.4	10	18	1	2	2
94	39	156	59	6	1.4	21	24	1	2	2
95	43	170	72	5	1.8	10	14	1	3	2
96	40	170	70	5	1.8	2	6	1	2	2
97	48	165	86	4	1.6	4	6	1	3	2
98	48	168	90	6	1.8	2	10	1	2	2
99	70	155	55	6	1.4	4	6	1	2	2
100	38	160	62	5	1.4	4	7	1	2	2
101	35	176	84	4	1.8	2	12	2	2	2
102	47	160	85	3	1.6	2	10	1	2	2

## Sheet: Without LymE
Pationt number	Age	Height (cm)	Weight (kg)	Tomor size (cm)	Body surface area	Number of involved lymphnod	Number of drawn nodes	Surgery method	Polymorphism 3543	Polymorphism 705193
4	43	158	56	6	1.4	3	6	2	2	2
5	39	160	75	4	1.7	3	12	1	2	2
8	59	160	58	8	1.4	0	12	2	2	2
9	49	165	60	5	1.4	2	11	1	2	2
11	42	160	70	3	1.7	0	7	1	1	1
12	50	160	60	6	1.4	5	20	2	2	2
14	62	164	68	5	1.7	0	11	1	2	2
17	50	162	72	5	1.7	0	9	1	3	2
18	55	159	50	6	1.4	5	6	1	3	1
19	55	150	50	8	1.3	0	16	2	3	1
20	58	164	60	5	1.4	2	8	1	3	2
22	49	162	80	8	1.7	1	18	2	2	2
23	45	158	70	3	1.6	0	6	1	2	2
25	53	162	72	4	1.7	2	13	2	2	2
26	63	160	60	4	1.4	7	12	2	3	2
27	50	155	60	5	1.4	5	19	2	3	2
29	55	164	90	5	1.8	2	9	1	2	1
31	54	160	70	3	1.7	5	11	2	2	2
32	50	160	50	5	1.4	0	15	1	2	2
35	55	167	70	6	1.7	0	16	2	1	1
36	54	150	68	3	1.7	2	6	2	2	2
37	48	164	60	6	1.4	1	6	1	3	2
38	35	165	70	5	1.7	6	7	1	1	1
39	39	153	53	3	1.4	0	6	1	1	2
40	45	155	77	3	0	2	11	2	2	2
45	47	160	69	9	1.7	0	6	1	2	2
46	40	155	72	9	1.7	0	6	1	2	2
48	45	155	70	5	1.6	2	6	1	1	1
50	39	150	70	4	1.6	1	11	1	1	1
51	55	160	60	3	1.4	1	13	1	1	1
53	43	156	59	6	1.4	0	6	1	1	1
54	51	162	72	3	1.7	0	9	1	1	1
56	60	168	60	3	1.5	2	8	1	1	1
58	56	153	80	4	1.6	0	6	1	1	1
60	46	160	53	5	1.4	1	9	2	1	1
62	65	160	70	5	1.7	6	15	2	1	1
63	50	160	58	6	1.4	9	15	2	2	2
67	47	160	95	4	1.7	8	12	2	2	2
69	40	170	72	6	1.8	0	14	1	2	2
73	39	176	84	4	1.8	1	8	1	2	2
74	47	170	62	4	1.5	0	15	2	1	1
76	38	170	69	4	1.8	0	10	2	2	2
77	47	160	69	10	1.7	9	13	2	2	1
78	38	167	67	5	1.7	2	6	1	1	1
79	40	150	50	10	1.3	1	16	2	1	1
82	38	156	59	5	1.4	0	13	1	1	1
84	45	154	60	5	1.3	2	6	1	1	1
89	50	150	50	4	1.4	2	6	2	1	1
90	40	167	75	5	1.7	4	7	1	1	1
92	57	150	68	5	1.4	6	10	2	1	1
93	64	160	68	5	1.5	0	17	2	1	1
